# Supplementary material
Source: PubMed Central journal article supplement (PMC6109916)
Supplement: supp_RA118.004406_138743_0_supp_152127_pc4klq.pdf [file supp_RA118.004406_138743_0_supp_152127_pc4klq.pdf]

## SUPPORTING INFORMATION

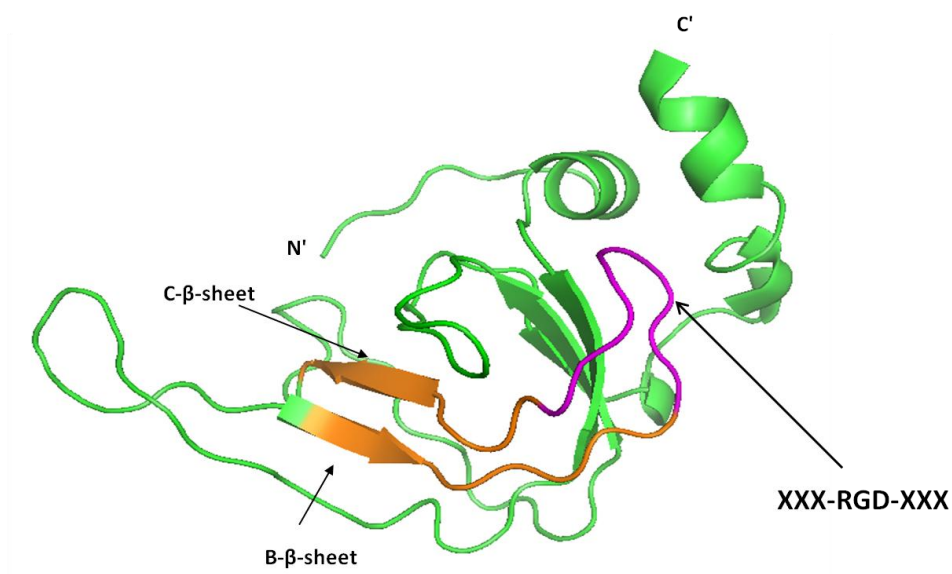

**Fig. S1.** N-TIMP2 structure and library position. The B-C loop is located between the B- $\beta$  sheet and C- $\beta$  sheet at positions 43-66 (orange and pink). The N-TIMP2<sub>RGD</sub> library, located at the apex of the B-C loop, corresponding to the location of the RGD motif in fibrinogen, is located at positions 51-59 (pink). Based on 1BQQ.pdb

**Supplementary Table 1. Clones identified in Sort 5.**

| Clone    | Loop sequence* | Repetitions |
|----------|----------------|-------------|
| Clone 1  | SDQ-RGD-NAP    | 1           |
| Clone 2  | PEP-RGD-NAR    | 1           |
| Clone 3  | HTV-RGD-MPS    | 1           |
| Clone 4  | QEP-RGD-MPV    | 2           |
| Clone 5  | KTA-RGD-MPA    | 1           |
| Clone 14 | HGL-RGD-MPS    | 1           |
| Clone 15 | SMN-RGD-TIP    | 2           |
| Clone 17 | SQA-RGD-MPN    | 1           |
| Clone 18 | SEV-RGD-VPN    | 1           |

\*Amino acids at positions 51-59.

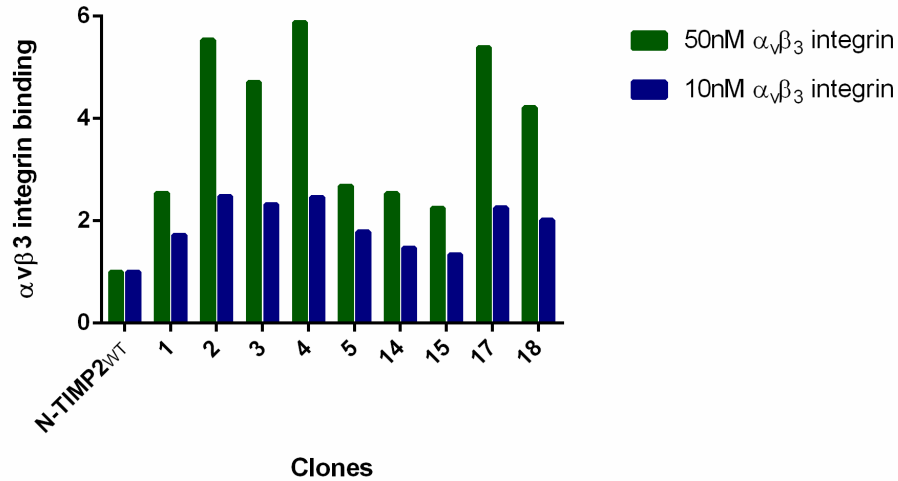

**Fig. S2.** Binding of the YSD N-TIMP2<sub>RGD</sub> sort 5 clones to soluble integrin  $\alpha_v\beta_3$ . Clones binding to integrin  $\alpha_v\beta_3$  were normalized to N-TIMP2<sub>WT</sub>.

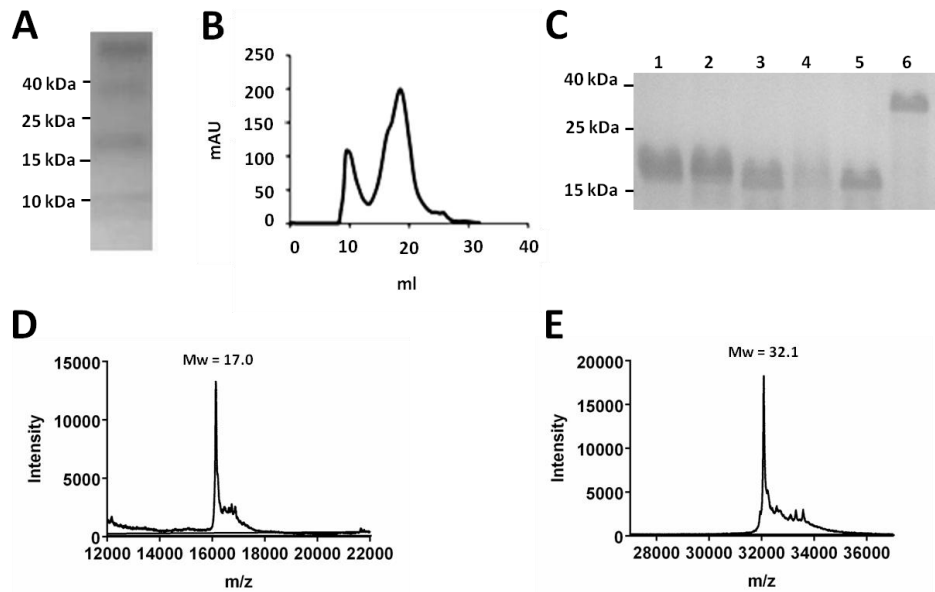

**Fig. S3.** N-TIMP2<sub>WT,RGD</sub> purification. (A) SDS-PAGE results of N-TIMP2<sub>WT,RGD</sub> (after nickel column chromatography). Four proteins of different sizes were detected, including a protein of the desired size (~17 kDa). (B) Size-exclusion purification of N-TIMP2<sub>WT,RGD</sub>. The right peak represents the desired protein. (C) SDS-PAGE of all the N-TIMP2 variants (after size-exclusion chromatography). Lanes 1-6 represent N-TIMP2<sub>WT</sub>, N-TIMP2<sub>5M</sub>, N-TIMP2<sub>WT,RGD</sub>, N-TIMP2<sub>5M,RGD</sub>, Ala-N-TIMP<sub>WT,RGD</sub> and N-TIMP2<sub>HD</sub>, respectively. Bands of the correct sizes were detected (32 kDa for the N-TIMP2<sub>HD</sub> and 17 kDa for all the other variants). (D) Mass spectrometry analysis of N-TIMP2<sub>WT,RGD</sub>. (E) Mass spectrometry analysis of N-TIMP2<sub>HD</sub>.

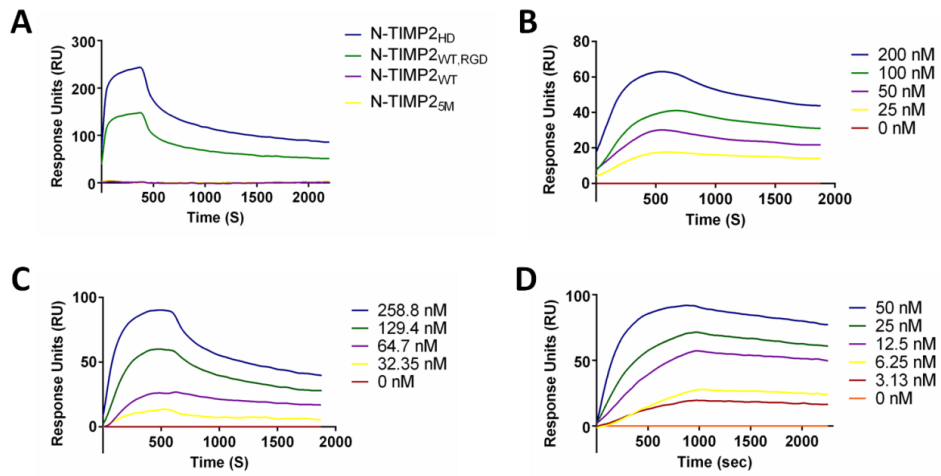

**Fig. S4.** Surface plasmon resonance sensorgrams. (A) N-TIMP2<sub>WT,RGD</sub> and N-TIMP2<sub>HD</sub> but not N-TIMP2<sub>WT</sub> and N-TIMP2<sub>5M</sub> bind to integrin  $\alpha_v\beta_3$ . Each variant (1  $\mu\text{M}$ ) was allowed to flow over integrin  $\alpha_v\beta_3$  immobilized on a chip, and binding was detected as an increase in response units. (B) Ala-N-TIMP2<sub>WT,RGD</sub> binds to integrin  $\alpha_v\beta_3$ . N-TIMP2<sub>5M,RGD</sub> binds both integrin  $\alpha_v\beta_3$  (C) and MMP-14<sub>CAT</sub> (D).

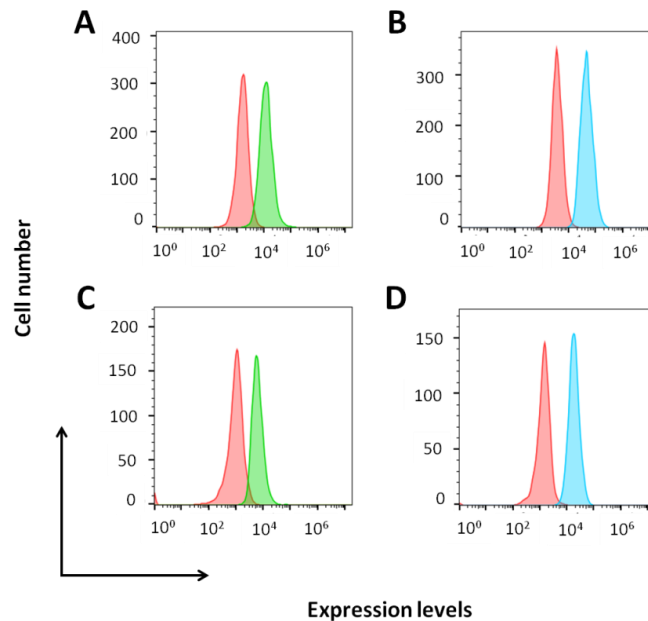

**Fig. S5.** Expression of MMP-14 (green) and integrin  $\alpha_v\beta_3$  (blue) on TIME and U87MG cell lines compared to the control (red). Expression of MMP-14 (A) and integrin  $\alpha_v\beta_3$  (B) on the U87MG cell line. Expression of MMP-14 (C) and integrin  $\alpha_v\beta_3$  (D) on the TIME cell line.

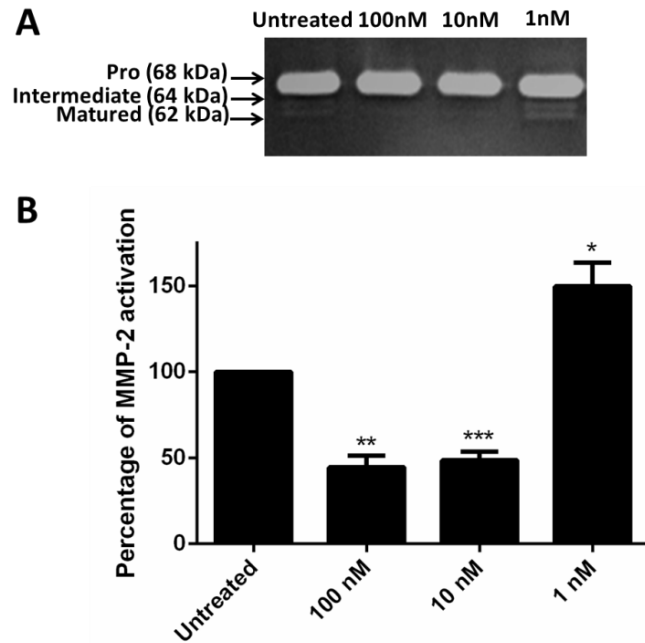

**Fig. S6.** Effect of the FL-TIMP2 concentration on pro-MMP-2 activation. The U87MG cell line was treated with different concentrations of FL-TIMP2 (100 nM, 10 nM and 1 nM). (A) Gelatin zymography gel results. (B) Percentage of catalytically active MMP-2. The catalytically active MMP-2, i.e. intermediate + matured forms, of each treatment was normalized to untreated cells. At high concentrations of FL-TIMP2, inhibition of pro-MMP-2 activation was observed, while at low concentrations an increase in pro-MMP-2 was detected. Error bars represent SD. Statistical analysis was performed by Student's t-test compared to the untreated control; \* $P < 0.05$ , \*\* $P < 0.005$ , \*\*\* $P < 0.001$ ,  $n = 3$ .

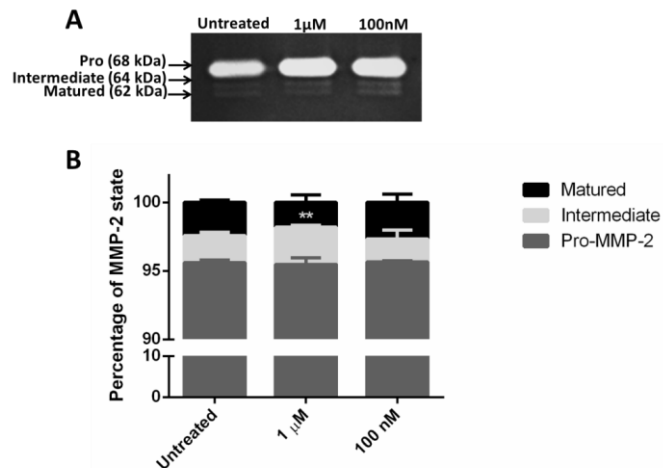

**Fig. S7.** Effect of cRGD treatment on the percentage of intermediate MMP-2. The U87MG cell line was treated with different concentrations of cRGD (1 μM and 100 nM). (A) Gelatin zymography gel results. (B) Quantification of the percentage of each MMP-2 form, i.e., pro/intermediate/matured [the band intensity of each MMP-2 state, i.e., pro-MMP-2 (68 kDa), intermediate MMP-2 (64 kDa) and matured MMP-2 (62 kDa), was divided by the total band intensity of all the MMP-2 forms, i.e., pro+intermediate+ matured MMP-2]. Processing of the intermediate form was significantly inhibited by 1 μM of cRGD. Error bars represent SEM. Statistical analysis was performed by Student's t-test compared to the untreated control; \*\* $P < 0.005$ ,  $n = 3$ .
